# Supplementary material for: Hospital outcomes of community-acquired COVID-19 versus influenza: Insights from the Swiss hospital-based surveillance of influenza and COVID-19
Source: PubMed Central journal article supplement (PMC8739338; doi:10.2807/1560-7917.es.2022.27.1.2001848), 2022-01-06

This supplementary material is hosted by *Eurosurveillance* as supporting information alongside the article 'Hospital outcomes of community-acquired COVID-19 versus influenza: Insights from the Swiss hospital-based surveillance of influenza and COVID-19', on behalf of the authors, who remain responsible for the accuracy and appropriateness of the content. The same standards for ethics, copyright, attributions and permissions as for the article apply. Supplements are not edited by *Eurosurveillance* and the journal is not responsible for the maintenance of any links or email addresses provided therein.

## Statistics

The method and results of the validation of the weights is provided in Supplementary Table 1. In a second step, subdistribution hazard analysis using the Fine & Gray model were applied to determine the cumulative risk of death or ICU admission associated with COVID-19 versus influenza. The main analyses were adjusted for sex, age, and university hospital as treatment center (available for all cases), to adjust for unmeasured confounders between university vs non-university centers. In a subgroup analysis we adjusted in addition for body weight and the presence of comorbidities. Since this information was not systematically collected by all centers we included only patients/centers where this info was available (n=2634; 1731 for COVID-19 and 903 for Influenza). There, we also adjusted for weight and presence of comorbidities (cardiovascular, asthma, respiratory, hemato-immunological, renal and neurological; Suppl. Table 2). Further subgroup analysis focused on i) “in-hospital transfers” to the ICU, excluding direct admission to the ICU from the community and ii) community transfers, excluding patients admitted from long term care facilities (LTCF), as during the COVID-19 pandemic fewer LTCF cases may have been transferred to hospital to prevent overburdening of hospital capacities and iii) a comparison of Influenza A with Covid-19 (excluding the 50 Influenza B cases), the exclude potential confounding of co-circulating Influenza A and B strains.

### Supplementary Table 1: Balance check of inverse probability weights

We used `balance.IPW` from the `CausalGAM` package (Ref R): This function calculates weighted means of covariates and then examines the differences in the weighted means across influenza and COVID-19 cases as a diagnostic for covariate balance for inverse probability weighting.

The standardized mean differences between all variables in the dataset are reported along with a z-statistics for these standardized differences, whereby z-statistics closer to 0 imply better univariate mean balance.

The columns are (from left to right) the observed mean of the covariate among the COVID-19 patients, the observed mean of the covariate among the influenza patients, the weighted mean of the covariate among the COVID-19 patients, the weighted mean of the covariate among the influenza patients, the weighted mean difference, and the z-statistic for the difference.

The formula (logistic regression with logit-link) used for calculation of weights was:

`Virus_type ~ Age + Gender + Admission_to_University Hospital`

|                                      | obs.mean.<br>C | obs.mean.<br>I | w.mean.C | w.mean.I | w.mean.diff | z      |
|--------------------------------------|----------------|----------------|----------|----------|-------------|--------|
| Age                                  | 65.11          | 70.41          | 66.76    | 66.43    | 0.33        | 2.252  |
| Gender (% female)                    | 0.39           | 0.52           | 0.44     | 0.45     | -0.01       | -3.717 |
| Admission to University hospital (%) | 0.56           | 0.68           | 0.60     | 0.60     | -0.00       | -0.689 |

**Supplementary Table 2: Balance check of inverse probability weights for complete case analysis**

The formula (logistic regression with logit-link) was:

Virus\_type Age + Gender + Admission\_to\_University Hospital + weight + com\_cardiovascular + comorbidity\_asthma + comorbidity\_neuro\_impair + comorbidity\_renal + comorbidity\_hemato\_immuno

|                                  | obs.mean.Covid-19 | obs.mean.<br>Influenza | w.mean.<br>Covid-19 | w.mean.<br>Influenza | w.mean.diff | z      |
|----------------------------------|-------------------|------------------------|---------------------|----------------------|-------------|--------|
| Age                              | 68.957            | 73.196                 | 70.788              | 70.667               | 0.122       | 0.587  |
| Gender (female)                  | 0.406             | 0.494                  | 0.439               | 0.445                | -0.006      | -0.897 |
| Admission to university hospital | 0.515             | 0.681                  | 0.573               | 0.577                | -0.004      | -0.724 |
| Weight                           | 79.253            | 73.37                  | 77.023              | 77.457               | -0.434      | -1.21  |
| Comorbidities (Yes/No)           |                   |                        |                     |                      |             |        |
| Cardiovascular                   | 0.392             | 0.464                  | 0.423               | 0.423                | 0           | 0.041  |
| Asthma                           | 0.091             | 0.134                  | 0.108               | 0.109                | -0.001      | -0.239 |
| Neurological impairments         | 0.139             | 0.171                  | 0.149               | 0.16                 | -0.011      | -3.1   |
| Renal                            | 0.201             | 0.252                  | 0.228               | 0.223                | 0.005       | 0.793  |
| Hematological/immunological      | 0.021             | 0.159                  | 0.074               | 0.065                | 0.009       | 1.525  |

The table contains the same information as explained above (Supplementary Table 1).

**Supplementary table 3. Adjusted hazard ratios of primary and secondary outcomes (COVID-19 vs. influenza) by weighted cause-specific (CS) Cox models. Patients with hospital duration >30 days were right-censored at day 30.**

|                                      | <b>CS Hazard ratio</b> | <b>95% Confidence interval</b> | <b>p-value</b> |
|--------------------------------------|------------------------|--------------------------------|----------------|
| Primary outcome analysis             |                        |                                |                |
| Hospital mortality                   | 2.58                   | 1.90-3.50                      | <0.001         |
| Hospital discharge                   | 0.78                   | 0.72-0.84                      | <0.001         |
| Secondary outcome analysis           |                        |                                |                |
| ICU admission                        | 2.46                   | 2.00-3.01                      | <0.001         |
| Death before ICU admission           | 3.93                   | 2.61-5.95                      | <0.001         |
| Discharge alive before ICU admission | 0.95                   | 0.87-1.03                      | 0.181          |

**Supplementary Figure 1**

**Cumulative incidence plot. ICU admission with discharge and death before ICU admission as competing risk, by disease status (COVID-19 versus influenza); Patients directly admitted to the ICU from the community were excluded for this subgroup analysis.**

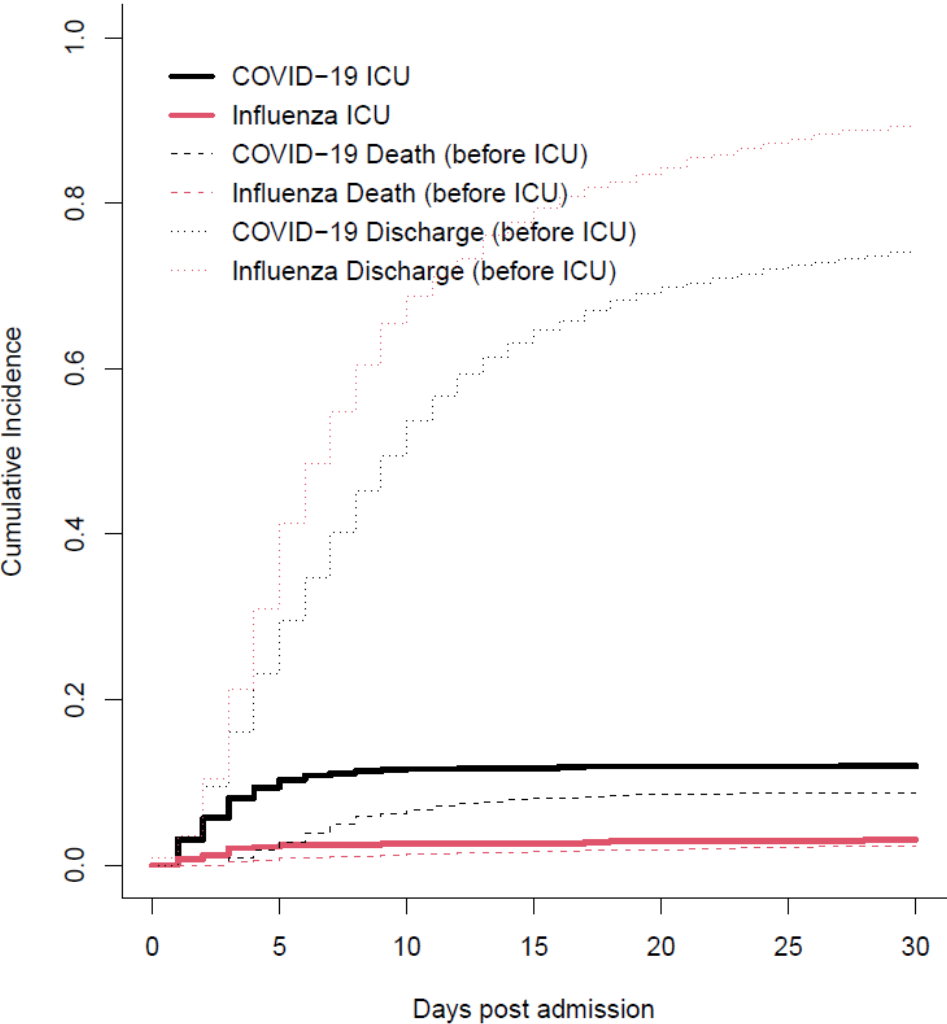

Supplement: 20-01848_SOMMERSTEIN_Supplementary_material.pdf [file 20-01848_SOMMERSTEIN_Supplementary_material.pdf]
